# Supplementary material
Source: MDPI journal article supplement (https://www.mdpi.com/2079-6412/14/2/181)
Supplement: s1 [file s1]

# Supplementary Materials: MWCNT–Polyimide Fiber-Reinforced Composite for High-Temperature Tribological Applications

Yunfeng Yan <sup>1,2</sup>, Beibei Zhang <sup>1</sup>, Jianzhang Wang <sup>1</sup>, Changhong Cao <sup>2,\*</sup> and Fengyuan Yan <sup>1,\*</sup>

<sup>1</sup> State Key Laboratory of Solid Lubrication, Lanzhou Institute of Chemical Physics, Chinese Academy of Sciences, Lanzhou 730000, China; yyf@licp.cas.cn (Y.Y.)

<sup>2</sup> Department of Mechanical Engineering, McGill University, H3A OC3, Montreal, Quebec, Canada

\* Correspondence: changhong.cao@mcgill.ca (C.C.); fyyan@licp.cas.cn (F.Y.)

| Results                       |                      | Results                       |                      |
|-------------------------------|----------------------|-------------------------------|----------------------|
| <b>(a)</b>                    |                      | <b>(b)</b>                    |                      |
| Image Raw Mean                | -3051.31 nm          | Image Raw Mean                | 107.002 nm           |
| Image Mean                    | -3051 nm             | Image Mean                    | 107 nm               |
| Image Standard Deviation      | 2149 nm              | Image Standard Deviation      | 645 nm               |
| Image Z Range                 | 6468 nm              | Image Z Range                 | 2724 nm              |
| Image Surface Area            | 279 $\mu\text{m}^2$  | Image Surface Area            | 22.8 $\mu\text{m}^2$ |
| Image Projected Surface Area  | 193 $\mu\text{m}^2$  | Image Projected Surface Area  | 19.5 $\mu\text{m}^2$ |
| Image Surface Area Difference | 44.0 %               | Image Surface Area Difference | 16.6 %               |
| Image Rq                      | 1986 nm              | Image Rq                      | 253 nm               |
| Image Ra                      | 1843 nm              | Image Ra                      | 215 nm               |
| Image Rmax                    | 6089 nm              | Image Rmax                    | 1189 nm              |
| Raw Mean                      | -707 nm              | Raw Mean                      | 347 nm               |
| Mean                          | -707 nm              | Mean                          | 347 nm               |
| Standard Deviation            | 272 nm               | Standard Deviation            | 385 nm               |
| Z Range                       | 1063 nm              | Z Range                       | 1688 nm              |
| Surface Area                  | 18.1 $\mu\text{m}^2$ | Surface Area                  | 18.3 $\mu\text{m}^2$ |
| Projected Surface Area        | 17.6 $\mu\text{m}^2$ | Projected Surface Area        | 15.9 $\mu\text{m}^2$ |
| Surface Area Difference       | 2.60 %               | Surface Area Difference       | 15.5 %               |
| Rq                            | 140 nm               | Rq                            | 160 nm               |
| Ra                            | 117 nm               | Ra                            | 136 nm               |
| Roughness Rmax                | 587 nm               | Roughness Rmax                | 817 nm               |
| Skewness                      | -0.689               | Skewness                      | -0.681               |
| Kurtosis                      | 2.41                 | Kurtosis                      | 2.40                 |
| Rz                            | 0.00 nm              | Rz                            | 0.00 nm              |
| Rz Count                      | 0.00                 | Rz Count                      | 0.00                 |
| Peak Count                    | 0.00                 | Peak Count                    | 0.00                 |
| Valley Count                  | 0.00                 | Valley Count                  | 0.00                 |
| Max Peak ht (Rp)              | 0.00 nm              | Max Peak ht (Rp)              | 0.00 nm              |
| Average Max Height (Rpm)      | 0.00 nm              | Average Max Height (Rpm)      | 0.00 nm              |
| Maximum Depth (Rv)            | 0.00 nm              | Maximum Depth (Rv)            | 0.00 nm              |
| Average Max Depth (Rvm)       | 0.00 nm              | Average Max Depth (Rvm)       | 0.00 nm              |
| Line Density                  | 0.00 / $\mu\text{m}$ | Line Density                  | 0.00 / $\mu\text{m}$ |
| Box X Dimension               | 5.27 $\mu\text{m}$   | Box X Dimension               | 4.94 $\mu\text{m}$   |
| Box Y Dimension               | 3.34 $\mu\text{m}$   | Box Y Dimension               | 3.21 $\mu\text{m}$   |

**Figure S1.** The roughness of PI fiber (a) before and (b) after MWCNTs decorations.

**Table S1.** Thermal data obtained TGA analyses of composites.

| Materials      | $T_5$ (°C) | $R_w$ (%) | Density (g/cm <sup>3</sup> ) |
|----------------|------------|-----------|------------------------------|
| TPI            | 568.2      | 54.4      | 1.357                        |
| TPI+PIF        | 574.1      | 57.6      | 1.384                        |
| TPI+PIF-NWCNTs | 582.7      | 61.7      | 1.419                        |

( $T_5$ : The temperature at 5% material mass loss; Residual mass fraction of the material at 750°C) .

**Table S2.** COF and wear rate of the PI samples at room temperature and 300°C conducted at 0.5m/s and 10N.

| Materials     | COF          |              | Wear rates ( $10^{-6}\text{mm}^3/\text{Nm}$ ) |            |
|---------------|--------------|--------------|-----------------------------------------------|------------|
|               | RT           | 300°C        | RT                                            | 300°C      |
| PI            | 0.301±0.0294 | 0.407±0.0332 | 6.93±0.53                                     | 23.92±2.13 |
| PI/PIF        | 0.321±0.0303 | 0.424±0.0198 | 4.87±0.48                                     | 16.72±2.11 |
| PI/PIF-MWCNTs | 0.297±0.0125 | 0.399±0.0329 | 3.92±0.55                                     | 15.66±1.87 |

**Table S3.** COF and wear rate of PI/PIF-MWCNTs composite with varied sliding speeds and normal loads.

| Parameter    | COF          | Wear rates ( $10^{-6}\text{mm}^3/\text{Nm}$ ) |
|--------------|--------------|-----------------------------------------------|
| 2N, 0.5m/s   | 0.270±0.0042 | 1.20±0.14                                     |
| 5N, 0.5m/s   | 0.288±0.0031 | 2.14±0.18                                     |
| 10N, 0.5m/s  | 0.297±0.0125 | 3.92±0.55                                     |
| 10N, 0.75m/s | 0.298±0.0090 | 5.48±0.36                                     |
| 10N, 1.0m/s  | 0.302±0.0031 | 7.19±0.64                                     |
